# Supplementary material for: Structure vs. chemistry: Alternate mechanisms for controlling leaf microbiomes
Source: PLOS journal article supplement (doi:10.1371/journal.pone.0275734), 2023-03-21
Supplement: S3 (10.1371/journal.pone.0275734.s003) [file journal.pone.0275734.s003]

**Fig S3**

**a. *Rhapis excelsa***

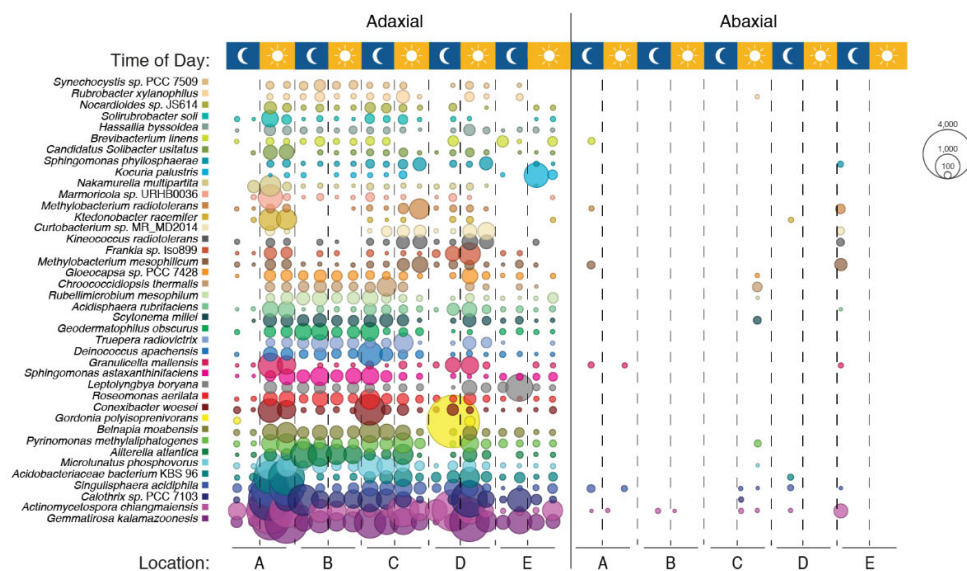

**b. *Cordyline fruticosa***

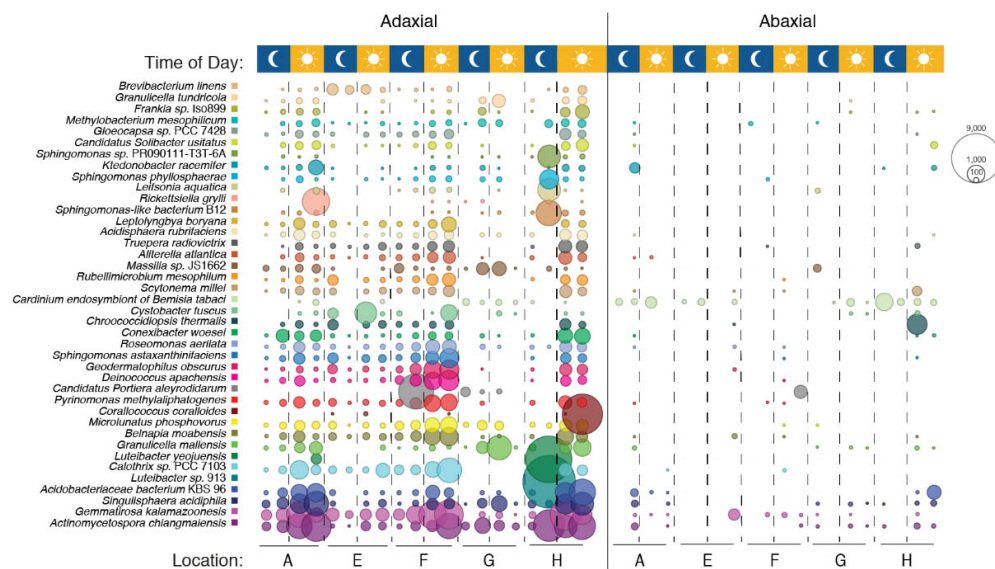

**Top 40 bacterial species on the adaxial and abaxial leaf surface.** The sun and moon symbols represent the time of sampling while letters refer to the sampling sites. Significant reduction in bacterial read counts was observed in both (a) *Rhapis excelsa* and (b) *Cordyline fruticosa* despite the location and time of day.
