# Supplementary material for: Structure vs. chemistry: Alternate mechanisms for controlling leaf microbiomes
Source: PLOS journal article supplement (doi:10.1371/journal.pone.0275734), 2023-03-21
Supplement: S8 (10.1371/journal.pone.0275734.s008) [file journal.pone.0275734.s008]

11

S8 Fig

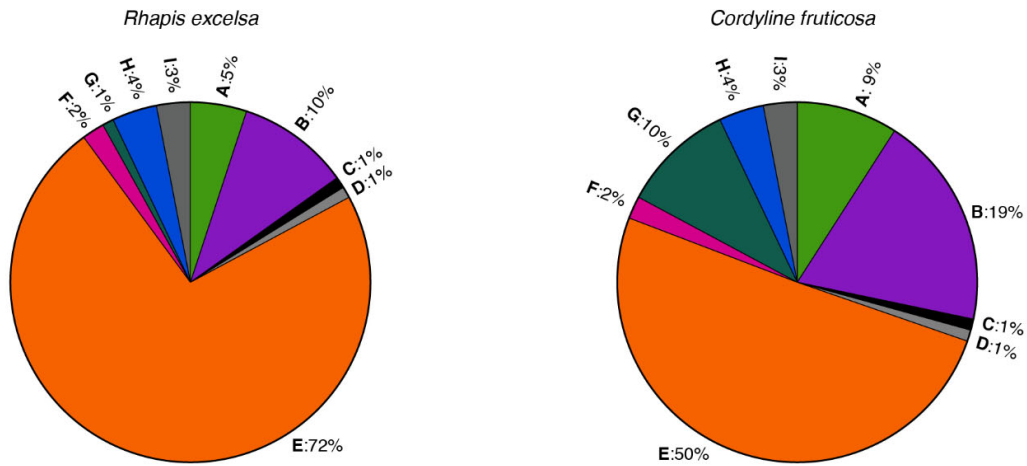

12

13 **Relative proportions of each co-occurrence cluster.** Based on the co-occurrence plot in Fig.  
 14 6, we expected that the dense network between cluster A and E would be the most dominant  
 15 microbial component. However, it was cluster E, the leaf blotch fungi, that was more prevalent  
 16 in the leaves of both plants.

17
